# Supplementary material for: Molecular Epidemiology of Streptococcus pneumoniae Isolates from Children with Recurrent Upper Respiratory Tract Infections
Source: PubMed Central journal article supplement (PMC4945090; doi:10.1371/journal.pone.0158909), 2016-07-14

S1 Fig. Diagram MLST - comparison of tested strains and 43 PMEN strains.

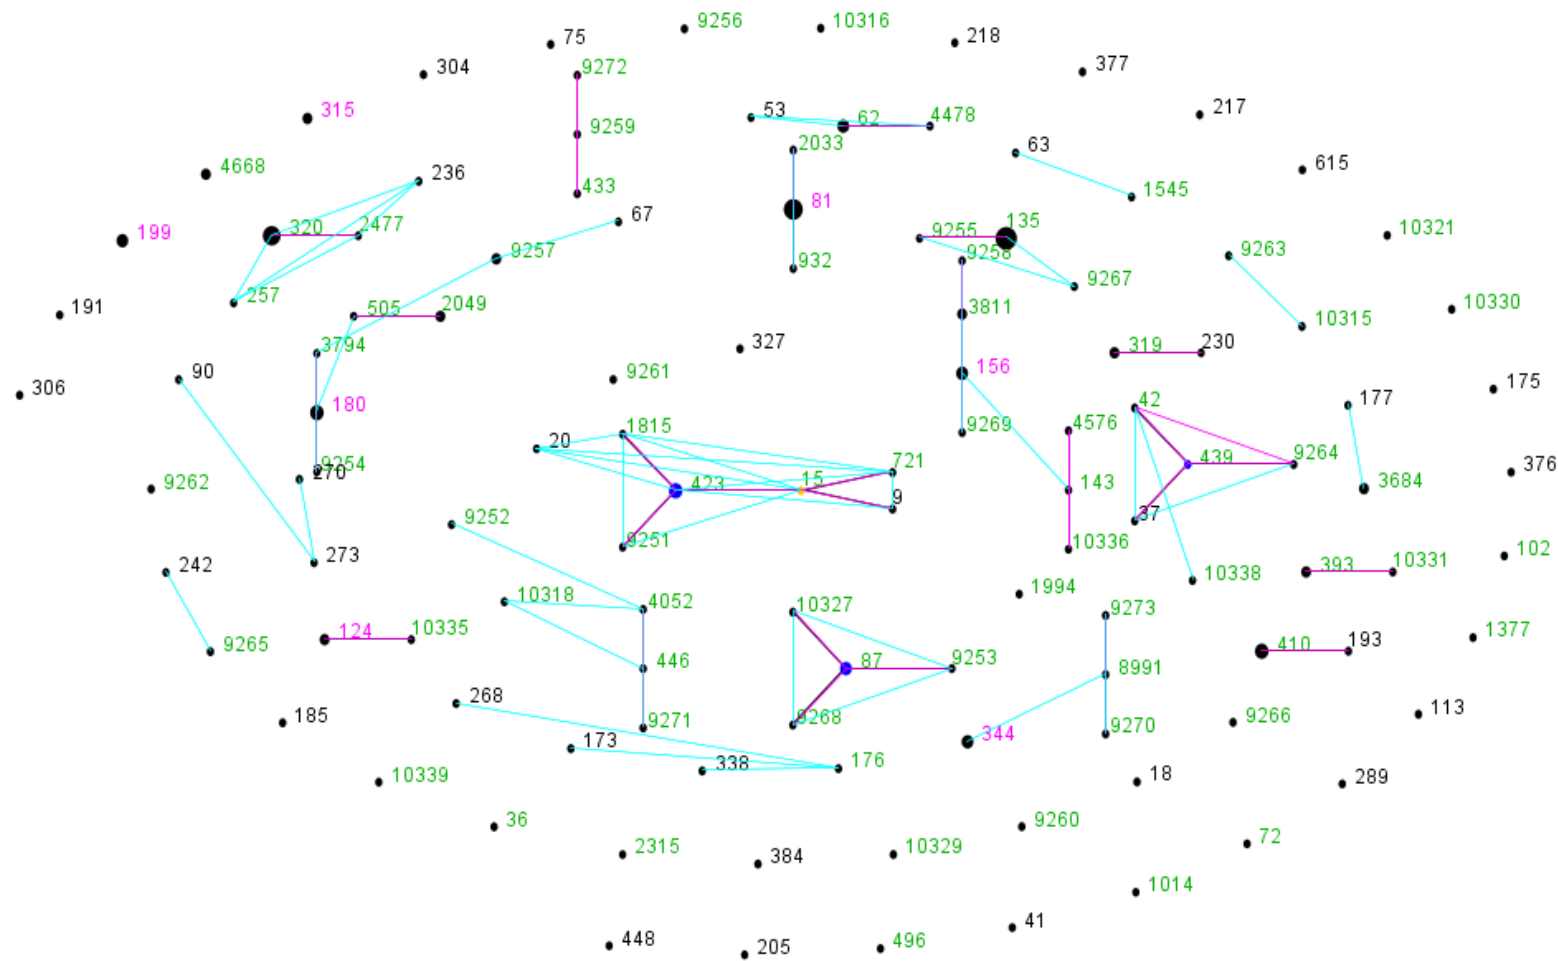

Supplement: pone.0158909.s001.pdf [file pone.0158909.s001.pdf]
