# Supplementary material for: Molecular Epidemiology of Streptococcus pneumoniae Isolates from Children with Recurrent Upper Respiratory Tract Infections
Source: PubMed Central journal article supplement (PMC4945090; doi:10.1371/journal.pone.0158909), 2016-07-14
Supplement: pone.0158909.s002.pdf [file pone.0158909.s002.pdf]

## S1 File. Analysis of the similarity among tested isolates made by eBURSTv3 software.

eBURST Report - Wed Aug 12 17:30:20 CEST 2015

No. isolates = 125 | No. STs = 82 | No. re-samplings for bootstrapping = 1000

No. loci per isolate = 7 | No. identical loci for group def = 6 | No. groups = 16

Group 1: No. Isolates = 8 | No. STs = 5 | Predicted Founder = 423

| ST   | FREQ | SLV | DLV | TLV | SAT | Average  |      | ST Bootstrap |        |
|------|------|-----|-----|-----|-----|----------|------|--------------|--------|
|      |      |     |     |     |     | Distance |      | Group        | Subgrp |
| 423  |      | 4   | 3   | 1   | 0   | 0        | 1.25 | 63%          | 16%    |
| 15   |      | 1   | 2   | 2   | 0   | 0        | 1.5  | 19%          | 0%     |
| 1815 |      | 1   | 1   | 3   | 0   | 0        | 1.75 | 0%           | 0%     |
| 9251 |      | 1   | 1   | 2   | 1   | 0        | 2.0  | 0%           | 0%     |
| 721  |      | 1   | 1   | 2   | 1   | 0        | 2.0  | 0%           | 0%     |

Group 2: No. Isolates = 6 | No. STs = 4 | Predicted Founder = 87

| ST    | FREQ | SLV | DLV | TLV | SAT | Average  |      | ST Bootstrap |        |
|-------|------|-----|-----|-----|-----|----------|------|--------------|--------|
|       |      |     |     |     |     | Distance |      | Group        | Subgrp |
| 87    |      | 3   | 3   | 0   | 0   | 0        | 1.0  | 72%          | 11%    |
| 10327 |      | 1   | 1   | 2   | 0   | 0        | 1.66 | 0%           | 0%     |
| 9253  |      | 1   | 1   | 2   | 0   | 0        | 1.66 | 0%           | 0%     |
| 9268  |      | 1   | 1   | 2   | 0   | 0        | 1.66 | 0%           | 0%     |

Group 3: No. Isolates = 6 | No. STs = 4 | Predicted Founder = Multiple Candidates

| ST   | FREQ | SLV | DLV | TLV | SAT | Average  |      | ST Bootstrap |        |
|------|------|-----|-----|-----|-----|----------|------|--------------|--------|
|      |      |     |     |     |     | Distance |      | Group        | Subgrp |
| 3811 |      | 2   | 2   | 1   | 0   | 0        | 1.33 | 27%          | 0%     |
| 156  |      | 2   | 2   | 1   | 0   | 0        | 1.33 | 29%          | 0%     |
| 9258 |      | 1   | 1   | 2   | 0   | 0        | 1.66 | 0%           | 0%     |
| 9269 |      | 1   | 1   | 2   | 0   | 0        | 1.66 | 0%           | 0%     |

Group 4: No. Isolates = 3 | No. STs = 3 | Predicted Founder = Multiple Candidates

| ST   | FREQ | SLV | DLV | TLV | SAT | Average  |     | ST Bootstrap |        |
|------|------|-----|-----|-----|-----|----------|-----|--------------|--------|
|      |      |     |     |     |     | Distance |     | Group        | Subgrp |
| 9259 |      | 1   | 2   | 0   | 0   | 0        | 1.0 | 9%           | 0%     |
| 9272 |      | 1   | 2   | 0   | 0   | 0        | 1.0 | 7%           | 0%     |
| 433  |      | 1   | 2   | 0   | 0   | 0        | 1.0 | 13%          | 0%     |

Group 5: No. Isolates = 5 | No. STs = 3 | Predicted Founder = 180

| ST   | FREQ | SLV | DLV | TLV | SAT | Average  |     | ST Bootstrap |        |
|------|------|-----|-----|-----|-----|----------|-----|--------------|--------|
|      |      |     |     |     |     | Distance |     | Group        | Subgrp |
| 180  |      | 3   | 2   | 0   | 0   | 0        | 1.0 | 29%          | 0%     |
| 9254 |      | 1   | 1   | 1   | 0   | 0        | 1.5 | 0%           | 0%     |
| 3794 |      | 1   | 1   | 1   | 0   | 0        | 1.5 | 0%           | 0%     |

Group 6: No. Isolates = 3 | No. STs = 3 | Predicted Founder = 8991

| ST   | FREQ | SLV | DLV | TLV | SAT | Average  |     | ST Bootstrap |        |
|------|------|-----|-----|-----|-----|----------|-----|--------------|--------|
|      |      |     |     |     |     | Distance |     | Group        | Subgrp |
| 8991 |      | 1   | 2   | 0   | 0   | 0        | 1.0 | 32%          | 0%     |
| 9273 |      | 1   | 1   | 1   | 0   | 0        | 1.5 | 0%           | 0%     |
| 9270 |      | 1   | 1   | 1   | 0   | 0        | 1.5 | 0%           | 0%     |

Group 7: No. Isolates = 9 | No. STs = 3 | Predicted Founder = 81

| ST   | FREQ | SLV | DLV | TLV | SAT | Average Distance | ST Bootstrap Group | Subgrp |
|------|------|-----|-----|-----|-----|------------------|--------------------|--------|
| 81   |      | 7   | 2   | 0   | 0   | 0 1.0            | 34%                | 0%     |
| 2033 |      | 1   | 1   | 1   | 0   | 0 1.5            | 0%                 | 0%     |
| 932  |      | 1   | 1   | 1   | 0   | 0 1.5            | 0%                 | 0%     |

Group 8: No. Isolates = 3 | No. STs = 3 | Predicted Founder = Multiple Candidates

| ST   | FREQ | SLV | DLV | TLV | SAT | Average Distance | ST Bootstrap Group | Subgrp |
|------|------|-----|-----|-----|-----|------------------|--------------------|--------|
| 42   |      | 1   | 2   | 0   | 0   | 0 1.0            | 7%                 | 0%     |
| 439  |      | 1   | 2   | 0   | 0   | 0 1.0            | 8%                 | 0%     |
| 9264 |      | 1   | 2   | 0   | 0   | 0 1.0            | 15%                | 0%     |

Group 9: No. Isolates = 3 | No. STs = 3 | Predicted Founder = Multiple Candidates

| ST    | FREQ | SLV | DLV | TLV | SAT | Average Distance | ST Bootstrap Group | Subgrp |
|-------|------|-----|-----|-----|-----|------------------|--------------------|--------|
| 4576  |      | 1   | 2   | 0   | 0   | 0 1.0            | 7%                 | 0%     |
| 143   |      | 1   | 2   | 0   | 0   | 0 1.0            | 7%                 | 0%     |
| 10336 |      | 1   | 2   | 0   | 0   | 0 1.0            | 15%                | 0%     |

Group 10: No. Isolates = 3 | No. STs = 3 | Predicted Founder = 446

| ST   | FREQ | SLV | DLV | TLV | SAT | Average Distance | ST Bootstrap Group | Subgrp |
|------|------|-----|-----|-----|-----|------------------|--------------------|--------|
| 446  |      | 1   | 2   | 0   | 0   | 0 1.0            | 31%                | 0%     |
| 9271 |      | 1   | 1   | 1   | 0   | 0 1.5            | 0%                 | 0%     |
| 4052 |      | 1   | 1   | 1   | 0   | 0 1.5            | 0%                 | 0%     |

Group 11: No. Isolates = 8 | No. STs = 2 | Predicted Founder = None

| ST   | FREQ | SLV | DLV | TLV | SAT | Distance |
|------|------|-----|-----|-----|-----|----------|
| 320  |      | 7   | 1   | 0   | 0   | 0 1.0    |
| 2477 |      | 1   | 1   | 0   | 0   | 0 1.0    |

Group 12: No. Isolates = 11 | No. STs = 2 | Predicted Founder = None

| ST   | FREQ | SLV | DLV | TLV | SAT | Distance |
|------|------|-----|-----|-----|-----|----------|
| 135  |      | 10  | 1   | 0   | 0   | 0 1.0    |
| 9255 |      | 1   | 1   | 0   | 0   | 0 1.0    |

Group 13: No. Isolates = 3 | No. STs = 2 | Predicted Founder = None

| ST   | FREQ | SLV | DLV | TLV | SAT | Distance |
|------|------|-----|-----|-----|-----|----------|
| 2049 |      | 2   | 1   | 0   | 0   | 0 1.0    |
| 505  |      | 1   | 1   | 0   | 0   | 0 1.0    |

Group 14: No. Isolates = 2 | No. STs = 2 | Predicted Founder = None

| ST | FREQ | SLV | DLV | TLV | SAT | Distance |
|----|------|-----|-----|-----|-----|----------|
|----|------|-----|-----|-----|-----|----------|

|       |   |   |   |   |   |     |
|-------|---|---|---|---|---|-----|
| 124   | 1 | 1 | 0 | 0 | 0 | 1.0 |
| 10335 | 1 | 1 | 0 | 0 | 0 | 1.0 |

Group 15: No. Isolates = 4 | No. STs = 2 | Predicted Founder = None

| ST   | FREQ | SLV | DLV | TLV | SAT | Distance |
|------|------|-----|-----|-----|-----|----------|
| 62   | 3    | 1   | 0   | 0   | 0   | 1.0      |
| 4478 | 1    | 1   | 0   | 0   | 0   | 1.0      |

Group 16: No. Isolates = 3 | No. STs = 2 | Predicted Founder = None

| ST    | FREQ | SLV | DLV | TLV | SAT | Distance |
|-------|------|-----|-----|-----|-----|----------|
| 393   | 2    | 1   | 0   | 0   | 0   | 1.0      |
| 10331 | 1    | 1   | 0   | 0   | 0   | 1.0      |

Singletons: size 36

10329  
9257  
9256  
10321  
9252  
319  
410  
315  
10318  
10316  
10315  
176  
3684  
102  
36  
1377  
2315  
257  
1014  
4668  
344  
72  
496  
10339  
10338  
9267  
9266  
9265  
9263  
10330  
9262  
9261  
1545  
9260  
199  
1994
