# Supplementary material for: Molecular Epidemiology of Streptococcus pneumoniae Isolates from Children with Recurrent Upper Respiratory Tract Infections
Source: PubMed Central journal article supplement (PMC4945090; doi:10.1371/journal.pone.0158909), 2016-07-14
Supplement: pone.0158909.s003.pdf [file pone.0158909.s003.pdf]

**S2 File. Analysis of the similarity among tested pneumococcal isolates and PMEN strains (highlighted) made by eBURSTv3 software.**

eBURST Report - Thu Oct 15 16:56:52 CEST 2015

No. isolates = 168 | No. STs = 118 | No. re-samplings for bootstrapping = 1000

No. loci per isolate = 7 | No. identical loci for group def = 6 | No. groups = 18

Group 1: No. Isolates = 9 | No. STs = 6 | Predicted Founder = 423

| ST       | FREQ | SLV | DLV | TLV | SAT | Average  |     | ST Bootstrap |        |
|----------|------|-----|-----|-----|-----|----------|-----|--------------|--------|
|          |      |     |     |     |     | Distance |     | Group        | Subgrp |
| 423      |      | 4   | 3   | 2   | 0   | 0        | 1.4 | 49%          | 21%    |
| 15       |      | 1   | 3   | 2   | 0   | 0        | 1.4 | 50%          | 19%    |
| 1815     |      | 1   | 1   | 3   | 1   | 0        | 2.0 | 0%           | 0%     |
| 721      |      | 1   | 1   | 3   | 1   | 0        | 2.0 | 0%           | 0%     |
| 9251     |      | 1   | 1   | 2   | 2   | 0        | 2.2 | 0%           | 0%     |
| <b>9</b> |      | 1   | 1   | 2   | 2   | 0        | 2.2 | 0%           | 0%     |

Group 2: No. Isolates = 6 | No. STs = 4 | Predicted Founder = 87

| ST        | FREQ | SLV | DLV | TLV | SAT | Average  |      | ST Bootstrap |        |
|-----------|------|-----|-----|-----|-----|----------|------|--------------|--------|
|           |      |     |     |     |     | Distance |      | Group        | Subgrp |
| <b>87</b> |      | 3   | 3   | 0   | 0   | 0        | 1.0  | 74%          | 15%    |
| 10327     |      | 1   | 1   | 2   | 0   | 0        | 1.66 | 0%           | 0%     |
| 9253      |      | 1   | 1   | 2   | 0   | 0        | 1.66 | 0%           | 0%     |
| 9268      |      | 1   | 1   | 2   | 0   | 0        | 1.66 | 0%           | 0%     |

Group 3: No. Isolates = 7 | No. STs = 4 | Predicted Founder = 156

| ST         | FREQ | SLV | DLV | TLV | SAT | Average  |      | ST Bootstrap |        |
|------------|------|-----|-----|-----|-----|----------|------|--------------|--------|
|            |      |     |     |     |     | Distance |      | Group        | Subgrp |
| <b>156</b> |      | 3   | 2   | 1   | 0   | 0        | 1.33 | 26%          | 0%     |
| 3811       |      | 2   | 2   | 1   | 0   | 0        | 1.33 | 29%          | 0%     |
| 9258       |      | 1   | 1   | 2   | 0   | 0        | 1.66 | 0%           | 0%     |
| 9269       |      | 1   | 1   | 2   | 0   | 0        | 1.66 | 0%           | 0%     |

Group 4: No. Isolates = 4 | No. STs = 4 | Predicted Founder = 439

| ST        | FREQ | SLV | DLV | TLV | SAT | Average  |      | ST Bootstrap |        |
|-----------|------|-----|-----|-----|-----|----------|------|--------------|--------|
|           |      |     |     |     |     | Distance |      | Group        | Subgrp |
| 439       |      | 1   | 3   | 0   | 0   | 0        | 1.0  | 61%          | 14%    |
| 42        |      | 1   | 2   | 1   | 0   | 0        | 1.33 | 4%           | 0%     |
| 9264      |      | 1   | 2   | 1   | 0   | 0        | 1.33 | 9%           | 0%     |
| <b>37</b> |      | 1   | 1   | 2   | 0   | 0        | 1.66 | 0%           | 0%     |

Group 5: No. Isolates = 3 | No. STs = 3 | Predicted Founder = Multiple Candidates

| ST   | FREQ | SLV | DLV | TLV | SAT | Average  |     | ST Bootstrap |        |
|------|------|-----|-----|-----|-----|----------|-----|--------------|--------|
|      |      |     |     |     |     | Distance |     | Group        | Subgrp |
| 9259 |      | 1   | 2   | 0   | 0   | 0        | 1.0 | 7%           | 0%     |
| 9272 |      | 1   | 2   | 0   | 0   | 0        | 1.0 | 10%          | 0%     |
| 433  |      | 1   | 2   | 0   | 0   | 0        | 1.0 | 15%          | 0%     |

Group 6: No. Isolates = 6 | No. STs = 3 | Predicted Founder = 180

Average ST Bootstrap

| ST   | FREQ | SLV | DLV | TLV | SAT | Distance | Group | Subgrp |
|------|------|-----|-----|-----|-----|----------|-------|--------|
| 180  |      | 4   | 2   | 0   | 0   | 0        | 1.0   | 32% 0% |
| 9254 |      | 1   | 1   | 1   | 0   | 0        | 1.5   | 0% 0%  |
| 3794 |      | 1   | 1   | 1   | 0   | 0        | 1.5   | 0% 0%  |

Group 7: No. Isolates = 3 | No. STs = 3 | Predicted Founder = 8991

| ST   | FREQ | SLV | DLV | TLV | SAT | Average Distance | ST Bootstrap Group | Subgrp |
|------|------|-----|-----|-----|-----|------------------|--------------------|--------|
| 8991 |      | 1   | 2   | 0   | 0   | 0                | 1.0                | 31% 0% |
| 9273 |      | 1   | 1   | 1   | 0   | 0                | 1.5                | 0% 0%  |
| 9270 |      | 1   | 1   | 1   | 0   | 0                | 1.5                | 0% 0%  |

Group 8: No. Isolates = 10 | No. STs = 3 | Predicted Founder = 81

| ST   | FREQ | SLV | DLV | TLV | SAT | Average Distance | ST Bootstrap Group | Subgrp |
|------|------|-----|-----|-----|-----|------------------|--------------------|--------|
| 81   |      | 8   | 2   | 0   | 0   | 0                | 1.0                | 32% 0% |
| 2033 |      | 1   | 1   | 1   | 0   | 0                | 1.5                | 0% 0%  |
| 932  |      | 1   | 1   | 1   | 0   | 0                | 1.5                | 0% 0%  |

Group 9: No. Isolates = 3 | No. STs = 3 | Predicted Founder = Multiple Candidates

| ST    | FREQ | SLV | DLV | TLV | SAT | Average Distance | ST Bootstrap Group | Subgrp |
|-------|------|-----|-----|-----|-----|------------------|--------------------|--------|
| 4576  |      | 1   | 2   | 0   | 0   | 0                | 1.0                | 7% 0%  |
| 143   |      | 1   | 2   | 0   | 0   | 0                | 1.0                | 8% 0%  |
| 10336 |      | 1   | 2   | 0   | 0   | 0                | 1.0                | 17% 0% |

Group 10: No. Isolates = 3 | No. STs = 3 | Predicted Founder = 446

| ST   | FREQ | SLV | DLV | TLV | SAT | Average Distance | ST Bootstrap Group | Subgrp |
|------|------|-----|-----|-----|-----|------------------|--------------------|--------|
| 446  |      | 1   | 2   | 0   | 0   | 0                | 1.0                | 31% 0% |
| 9271 |      | 1   | 1   | 1   | 0   | 0                | 1.5                | 0% 0%  |
| 4052 |      | 1   | 1   | 1   | 0   | 0                | 1.5                | 0% 0%  |

Group 11: No. Isolates = 8 | No. STs = 2 | Predicted Founder = None

| ST   | FREQ | SLV | DLV | TLV | SAT | Distance |     |
|------|------|-----|-----|-----|-----|----------|-----|
| 320  |      | 7   | 1   | 0   | 0   | 0        | 1.0 |
| 2477 |      | 1   | 1   | 0   | 0   | 0        | 1.0 |

Group 12: No. Isolates = 11 | No. STs = 2 | Predicted Founder = None

| ST   | FREQ | SLV | DLV | TLV | SAT | Distance |     |
|------|------|-----|-----|-----|-----|----------|-----|
| 135  |      | 10  | 1   | 0   | 0   | 0        | 1.0 |
| 9255 |      | 1   | 1   | 0   | 0   | 0        | 1.0 |

Group 13: No. Isolates = 3 | No. STs = 2 | Predicted Founder = None

| ST   | FREQ | SLV | DLV | TLV | SAT | Distance |     |
|------|------|-----|-----|-----|-----|----------|-----|
| 2049 |      | 2   | 1   | 0   | 0   | 0        | 1.0 |
| 505  |      | 1   | 1   | 0   | 0   | 0        | 1.0 |

Group 14: No. Isolates = 3 | No. STs = 2 | Predicted Founder = None

| ST    | FREQ | SLV | DLV | TLV | SAT | Distance |
|-------|------|-----|-----|-----|-----|----------|
| 124   |      | 2   | 1   | 0   | 0   | 0 1.0    |
| 10335 |      | 1   | 1   | 0   | 0   | 0 1.0    |

Group 15: No. Isolates = 3 | No. STs = 2 | Predicted Founder = None

| ST  | FREQ | SLV | DLV | TLV | SAT | Distance |
|-----|------|-----|-----|-----|-----|----------|
| 319 |      | 2   | 1   | 0   | 0   | 0 1.0    |
| 230 |      | 1   | 1   | 0   | 0   | 0 1.0    |

Group 16: No. Isolates = 5 | No. STs = 2 | Predicted Founder = None

| ST  | FREQ | SLV | DLV | TLV | SAT | Distance |
|-----|------|-----|-----|-----|-----|----------|
| 410 |      | 4   | 1   | 0   | 0   | 0 1.0    |
| 193 |      | 1   | 1   | 0   | 0   | 0 1.0    |

Group 17: No. Isolates = 4 | No. STs = 2 | Predicted Founder = None

| ST   | FREQ | SLV | DLV | TLV | SAT | Distance |
|------|------|-----|-----|-----|-----|----------|
| 62   |      | 3   | 1   | 0   | 0   | 0 1.0    |
| 4478 |      | 1   | 1   | 0   | 0   | 0 1.0    |

Group 18: No. Isolates = 3 | No. STs = 2 | Predicted Founder = None

| ST    | FREQ | SLV | DLV | TLV | SAT | Distance |
|-------|------|-----|-----|-----|-----|----------|
| 393   |      | 2   | 1   | 0   | 0   | 0 1.0    |
| 10331 |      | 1   | 1   | 0   | 0   | 0 1.0    |

Singletons: size 66

10329  
9257  
384  
9256  
289  
10321  
9252  
615  
185  
53  
315  
10318  
377  
218  
10316  
376  
217  
10315  
273  
113  
177

270  
176  
175  
173  
3684  
41  
306  
304  
205  
268  
102  
36  
1377  
2315  
90  
257  
1014  
4668  
448  
20  
344  
242  
18  
75  
72  
338  
496  
10339  
10338  
236  
9267  
9266  
9265  
9263  
10330  
9262  
9261  
1545  
9260  
199  
67  
191  
63  
1994  
327
